# Supplementary material for: Sedimentary organic matter signature hints at the phytoplankton-driven biological carbon pump in the central Arabian Sea
Source: Copernicus journal article supplement (doi:10.5194/bg-21-4681-2024), 2024-10-29
Supplement: Supplementary file 1 [file bg-21-4681-2024-supplement.pdf]

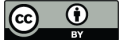

*Supplement of*

## **Sedimentary organic matter signature hints at the phytoplankton-driven biological carbon pump in the central Arabian Sea**

**Medhavi Pandey et al.**

*Correspondence to:* Haimanti Biswas ([haimanti.biswas.nio@gmail.com](mailto:haimanti.biswas.nio@gmail.com), [haimanti.biswas@nio.org](mailto:haimanti.biswas@nio.org))

The copyright of individual parts of the supplement might differ from the article licence.

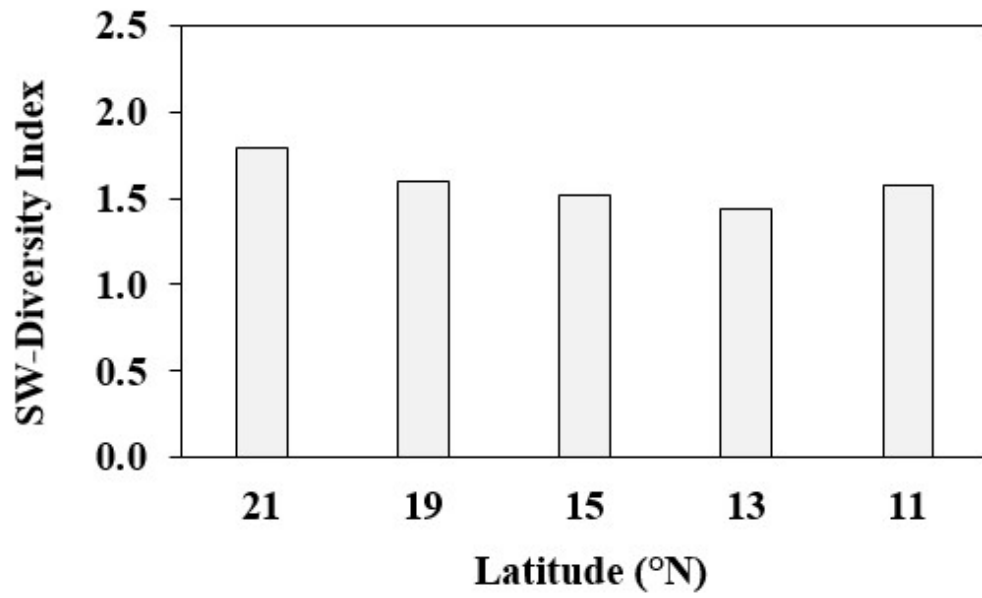

**Figure S 1.** Shannon-Wiener (SW) diversity index of diatoms calculated using frustules from the surface sediments of the central Arabian Sea.

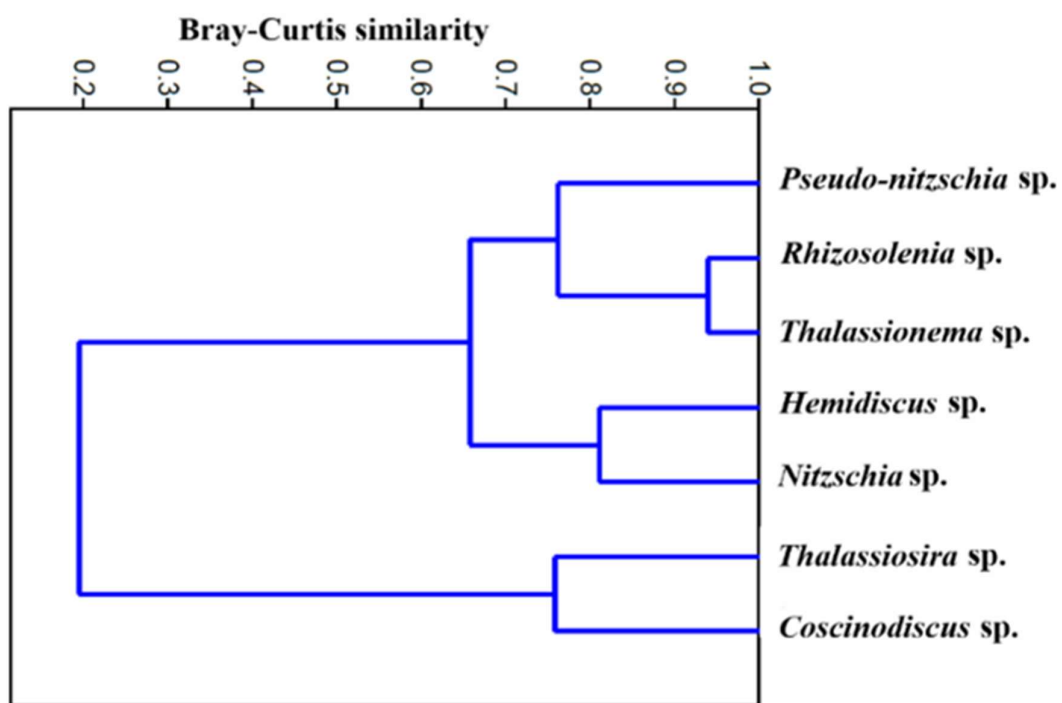

**Figure S 2.** Bray- Curtis similarity index between different diatom genera from the surface sediments of the central Arabian Sea.

**Table S 1.** Absolute abundance (AA) of diatom frustules (valves g<sup>-1</sup> dry sediment) and their relative abundance (RP %) in the surface sediments (0.5, 1 cm) from 5 locations in the Central Arabian Sea (average ± SD, n = 2).

| Locations                   | 21° N      |      | 19° N      |      | 15° N      |      | 13° N      |      | 11° N      |      |
|-----------------------------|------------|------|------------|------|------------|------|------------|------|------------|------|
|                             | AA         | RP   |
| <i>Actinoptychus</i> sp.    | 450±71     | 0.8  | 350±71     | 0.6  | 250±71     | 0.5  | 200±283    | 0.5  | 100±141    | 0.4  |
| <i>Coscinodiscus</i> sp.    | 24050±1202 | 45.1 | 29300±3818 | 46.1 | 20650±6010 | 44.1 | 11500±5223 | 30.7 | 6150±212   | 22.2 |
| <i>Cyclotella</i> sp.       | 1450±1768  | 2.7  | 900±707    | 1.4  | 250±71     | 0.5  | -          | 0.0  | 100±141    | 0.4  |
| <i>Hemidiscus</i> sp.       | 800±283    | 1.5  | 1800±849   | 2.8  | 1800±1414  | 3.8  | 2300±707   | 6.1  | 1900±141   | 6.8  |
| <i>Leptocylindrus</i> sp.   | -          | 0.0  | 500±707    | 0.8  | 350±495    | 0.7  | -          | 0.0  | -          | 0.0  |
| <i>Proboscia</i> sp.        | 200±283    | 0.4  | -          | 0.0  | -          | 0.0  | -          | 0.0  | -          | 0.0  |
| <i>Rhizosolenia</i> sp.     | 3700±990   | 6.9  | 2800±283   | 4.4  | 1300±424   | 2.8  | 450±71     | 1.2  | 550±495    | 2.0  |
| <i>Thalassiosira</i> sp.    | 12300±424  | 23.1 | 18450±778  | 29.0 | 16200±849  | 34.6 | 18050±7990 | 48.1 | 13700±4950 | 49.4 |
| <i>Triceratium</i> sp.      | 500±141    | 0.9  | 300±141    | 0.5  | 350±495    | 0.7  | 50±71      | 0.1  | -          | 0.0  |
| <b>Pennate diatoms</b>      |            |      |            |      |            |      |            |      |            |      |
| <i>Amphiprora</i> sp.       | 200±283    | 0.4  | -          | 0.0  | -          | 0.0  | -          | 0.0  | -          | 0.0  |
| <i>Bacillaria</i> sp.       | 550±778    | 1.0  | -          | 0.0  | -          | 0.0  | -          | 0.0  | -          | 0.0  |
| <i>Diploneis</i> sp.        | 50±71      | 0.1  | 100±141    | 0.2  | -          | 0.0  | -          | 0.0  | -          | 0.0  |
| <i>Epithemia</i> sp.        | -          | 0.0  | -          | 0.0  | -          | 0.0  | -          | 0.0  | 50±71      | 0.2  |
| <i>Eunotia</i> sp.          | 50±71      | 0.1  | -          | 0.0  | 50±71      | 0.1  | -          | 0.0  | -          | 0.0  |
| <i>Fragilaria</i> sp.       | 550±778    | 1.0  | 150±212    | 0.2  | 600±849    | 1.3  | 300±424    | 0.8  | 500±707    | 1.8  |
| <i>Fragilariopsis</i> sp.   | 250±212    | 0.5  | 200±283    | 0.3  | 250±71     | 0.5  | 550±495    | 1.5  | 650±919    | 2.3  |
| <i>Gyrosigma</i> sp.        | 100±141    | 0.2  | -          | 0.0  | -          | 0.0  | -          | 0.0  | -          | 0.0  |
| <i>Lioloma</i> sp.          | 300±424    | 0.6  | -          | 0.0  | -          | 0.0  | -          | 0.0  | -          | 0.0  |
| <i>Navicula</i> sp.         | 300±141    | 0.6  | 400±283    | 0.6  | -          | 0.0  | 150±71     | 0.4  | -          | 0.0  |
| <i>Nitzschia</i> sp.        | 1150±71    | 2.2  | 1800±849   | 2.8  | 1350±354   | 2.9  | 1300±141   | 3.5  | 850±495    | 3.1  |
| <i>Pleurosigma</i> sp.      | 50±71      | 0.1  | 50±71      | 0.1  | -          | 0.0  | -          | 0.0  | -          | 0.0  |
| <i>Pseudo-nitzschia</i> sp. | 3150±354   | 5.9  | 3350±354   | 5.3  | 2200±283   | 4.7  | 2200±      | 5.9  | 2550±778   | 9.2  |
| <i>Thalassionema</i> sp.    | 3150±1626  | 5.9  | 3150±1626  | 5.0  | 1250±71    | 2.7  | 450±212    | 1.2  | 650±71     | 2.3  |
